# Supplementary material for: Pregnant women’s psychological state and influence factors: anxiety, and depression during COVID-19 outbreak
Source: publisher site journal article supplement (doi:10.1515/jpm-2020-0541), 2021-04-16
Supplement: Supplementary file 1 [file j_jpm-2020-0541_suppl_002.docx]

**Supplemental Table 1: Zung Self-Rating Depressin Scale (SDS)**

| Place check mark in (√)in correct column | A little of the time | Some of the time | Good part of the time | Most of the time |
| --- | --- | --- | --- | --- |
| 1. I feel doen-hearted and blue. |  |  |  |  |
| 1. Morning is when I feel the best. |  |  |  |  |
| 1. I have crying spells or feel like it. |  |  |  |  |
| 1. I have trouble sleeping at night. |  |  |  |  |
| 1. I eat as much as I used to. |  |  |  |  |
| 1. I still enjoy sex. |  |  |  |  |
| 1. I notice that I am losing weight. |  |  |  |  |
| 1. I have trouble with constipation. |  |  |  |  |
| 1. My heart beats faster than usual. |  |  |  |  |
| 1. I get tired for no reason. |  |  |  |  |
| 1. My mind is as clear as it used to be. |  |  |  |  |
| 1. I find it easy to do the things I used to. |  |  |  |  |
| 1. I am restless and can’t keep still. |  |  |  |  |
| 1. I feel hopeful about the future. |  |  |  |  |
| 1. I am more irritable than usual. |  |  |  |  |
| 1. I find it easy to make decisions. |  |  |  |  |
| 1. I feel that I am useful and needed. |  |  |  |  |
| 1. My life is pretty full. |  |  |  |  |
| 1. I feel that others would be better off if were dead. |  |  |  |  |
| 1. I still enjoy the things I used to do. |  |  |  |  |

Note: For each item below, please place a check mark in the column which best describes how often you felt or behaved this way during the past several days.
